# Supplementary material
Source: Research Square preprint supplement (doi:10.21203/rs.3.rs-9686341/v1)

Supplementary Fig. 1

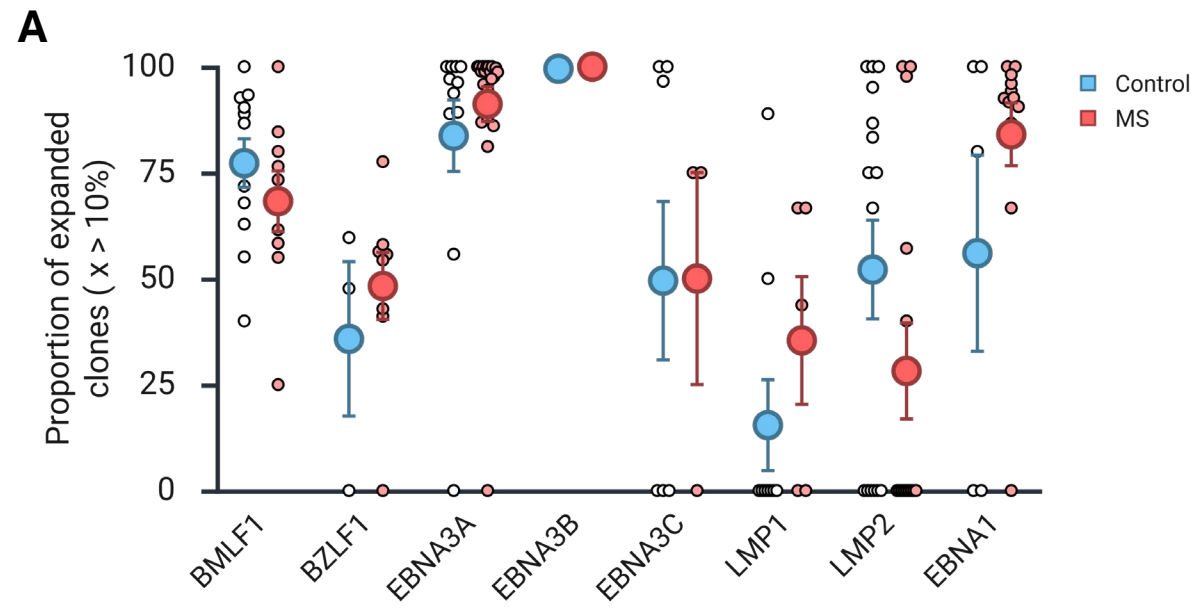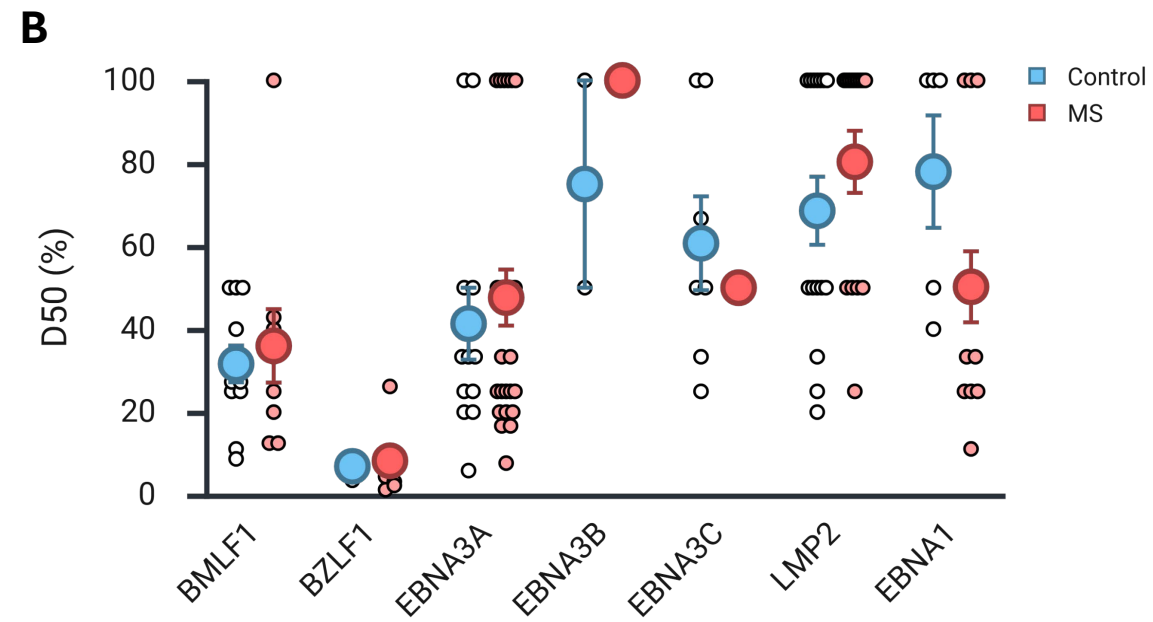

Supplementary Fig. 2

**A**

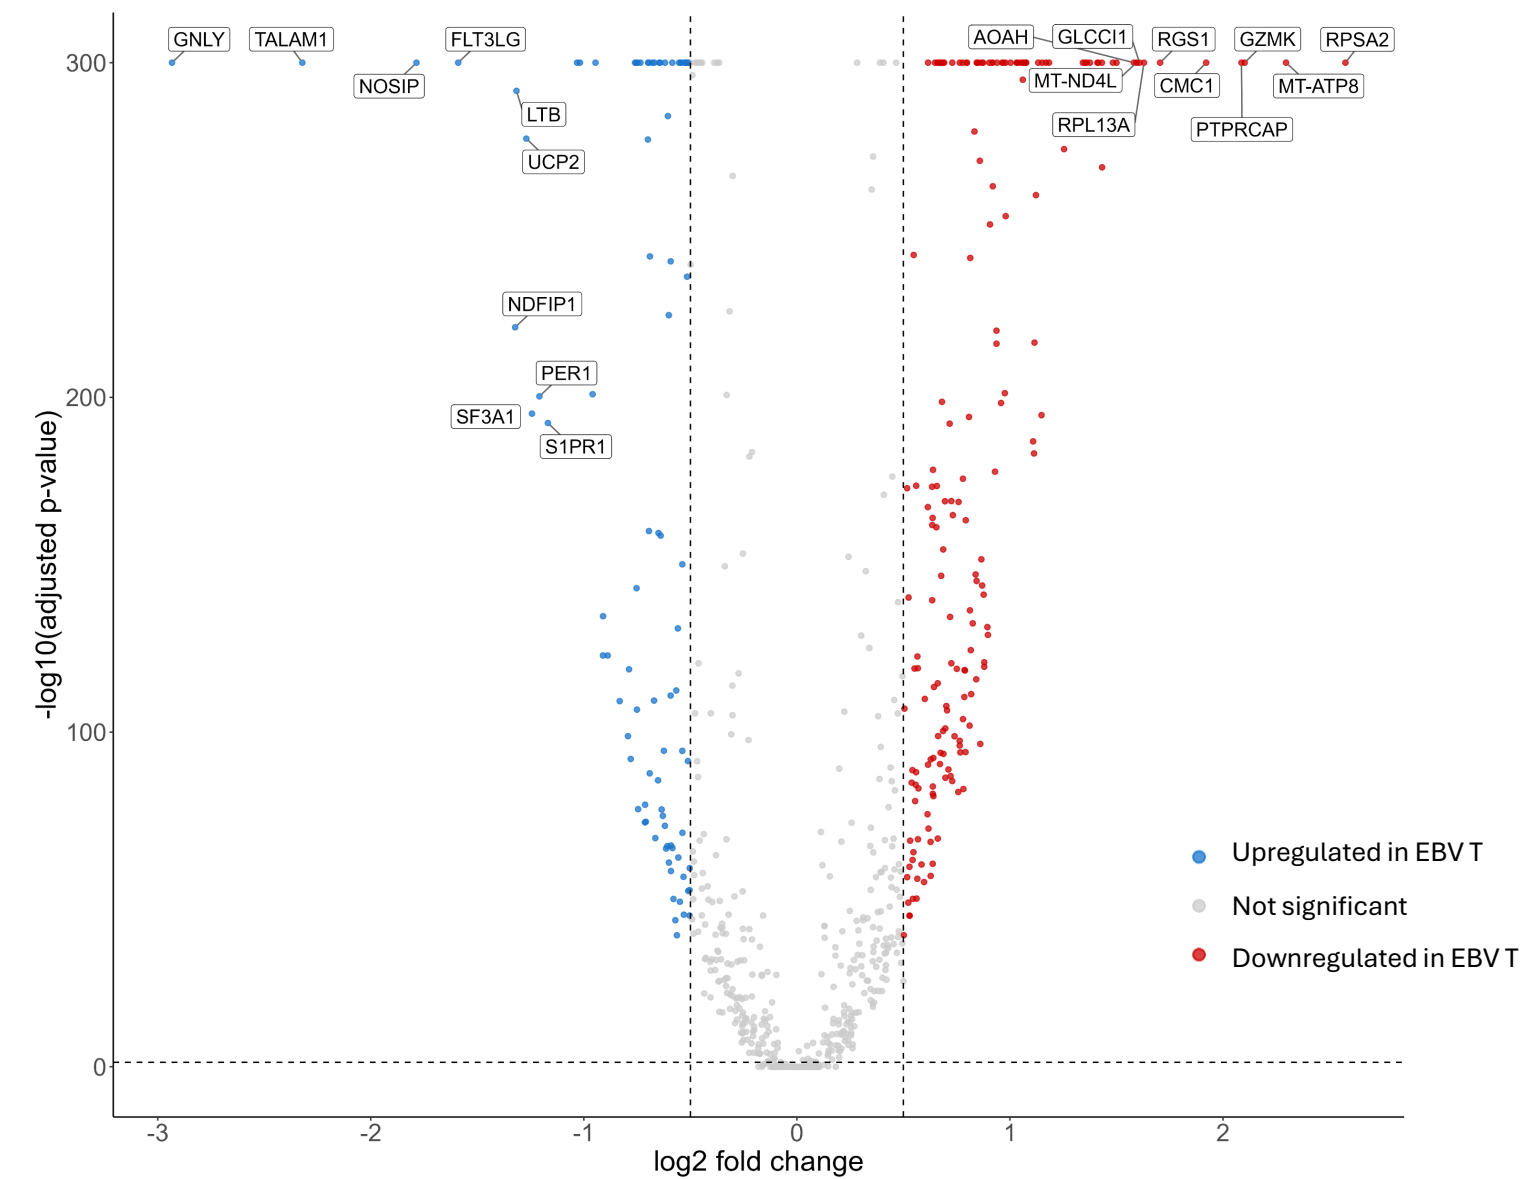

**B**

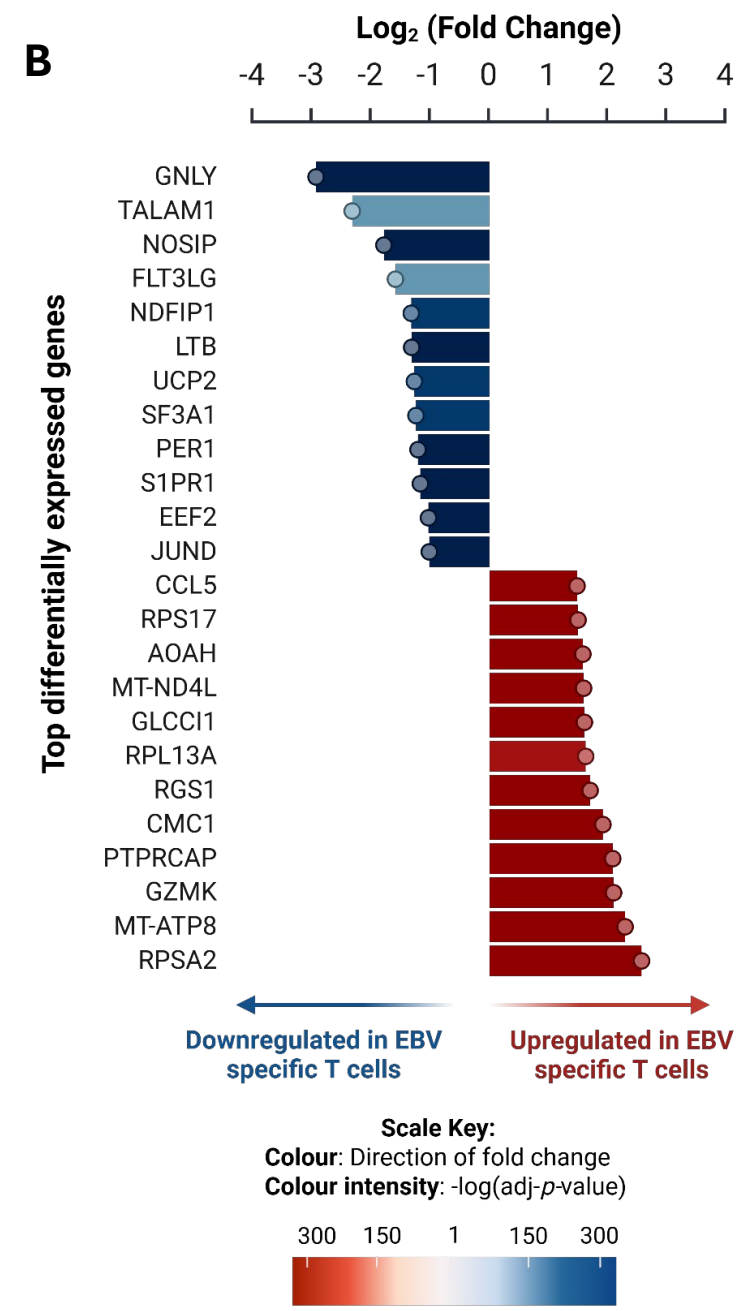

Supplementary Fig. 3

Latent-specific T cells

MS

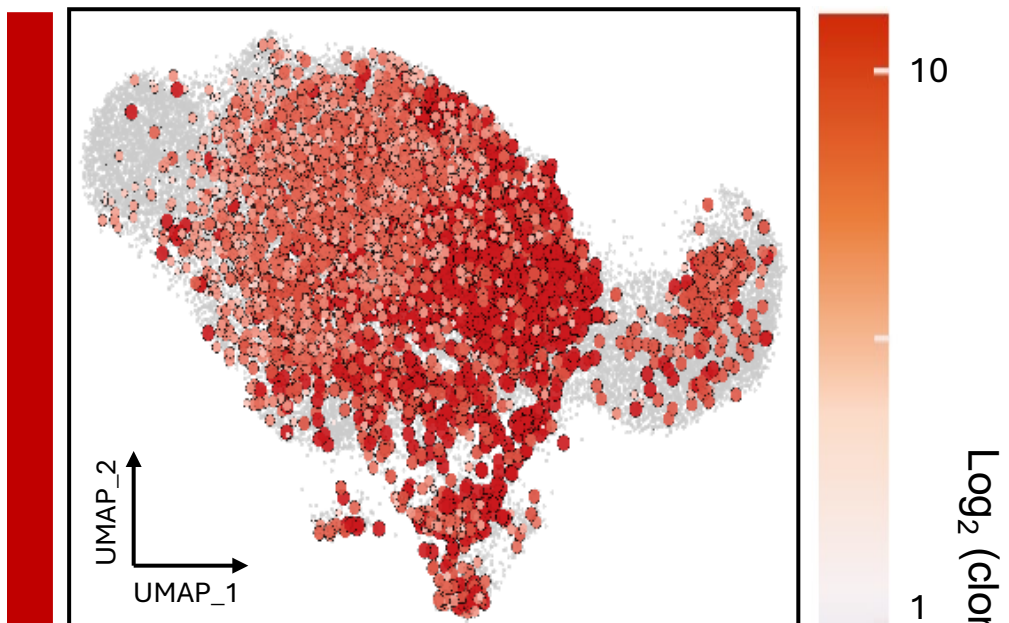

Control

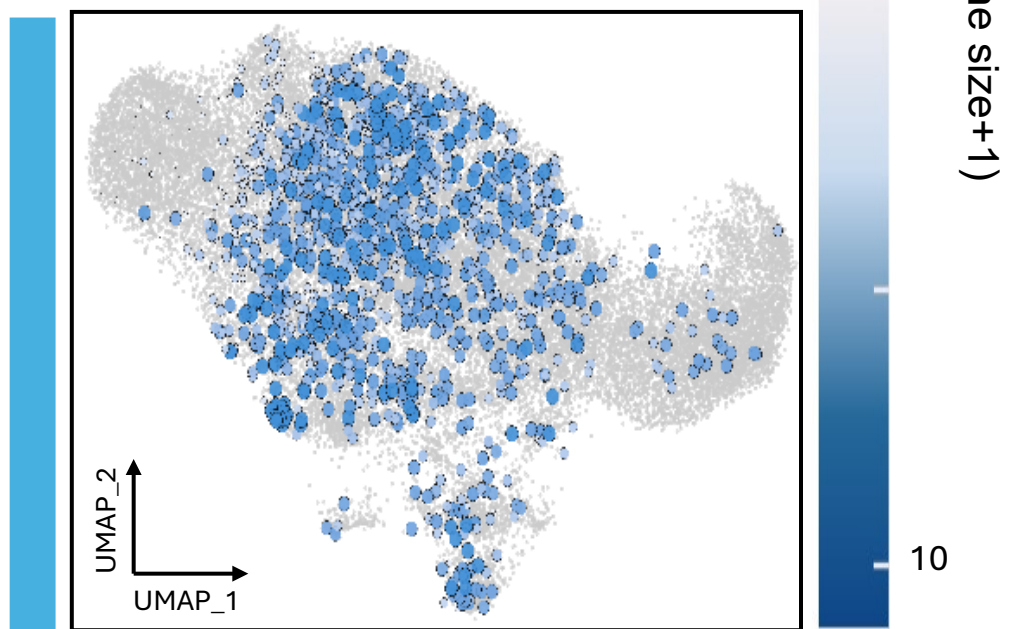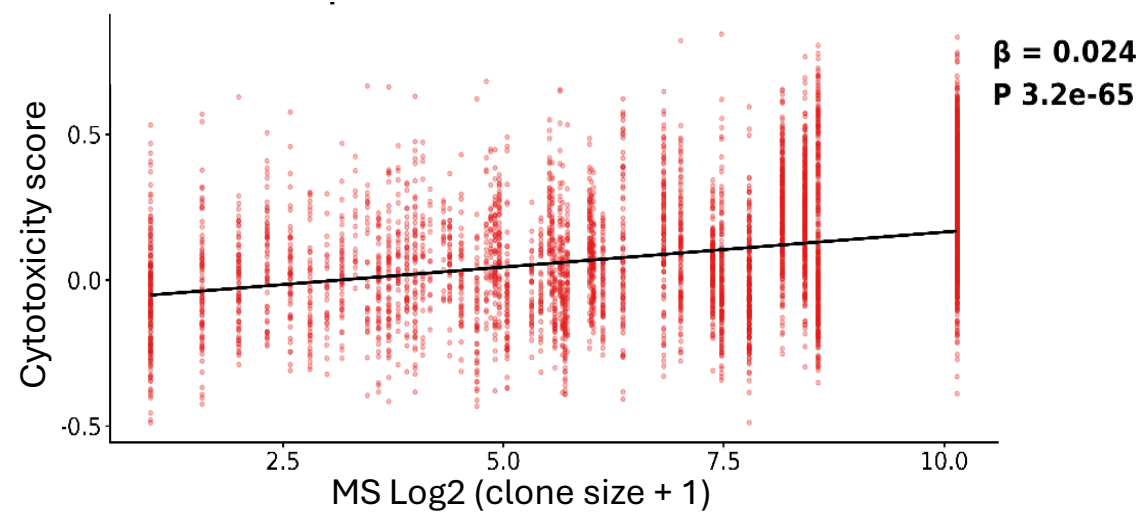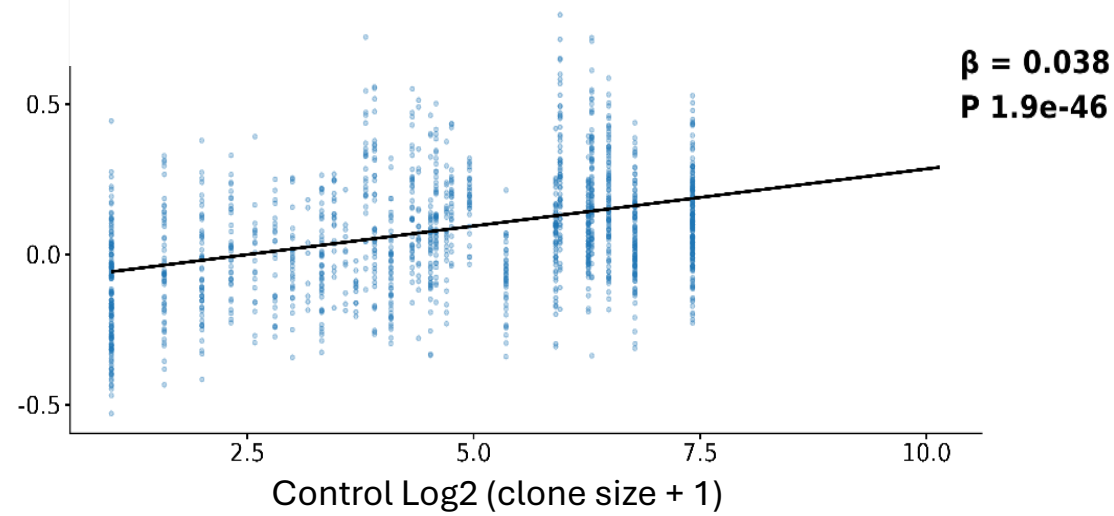

Supplementary Fig. 4

**A**

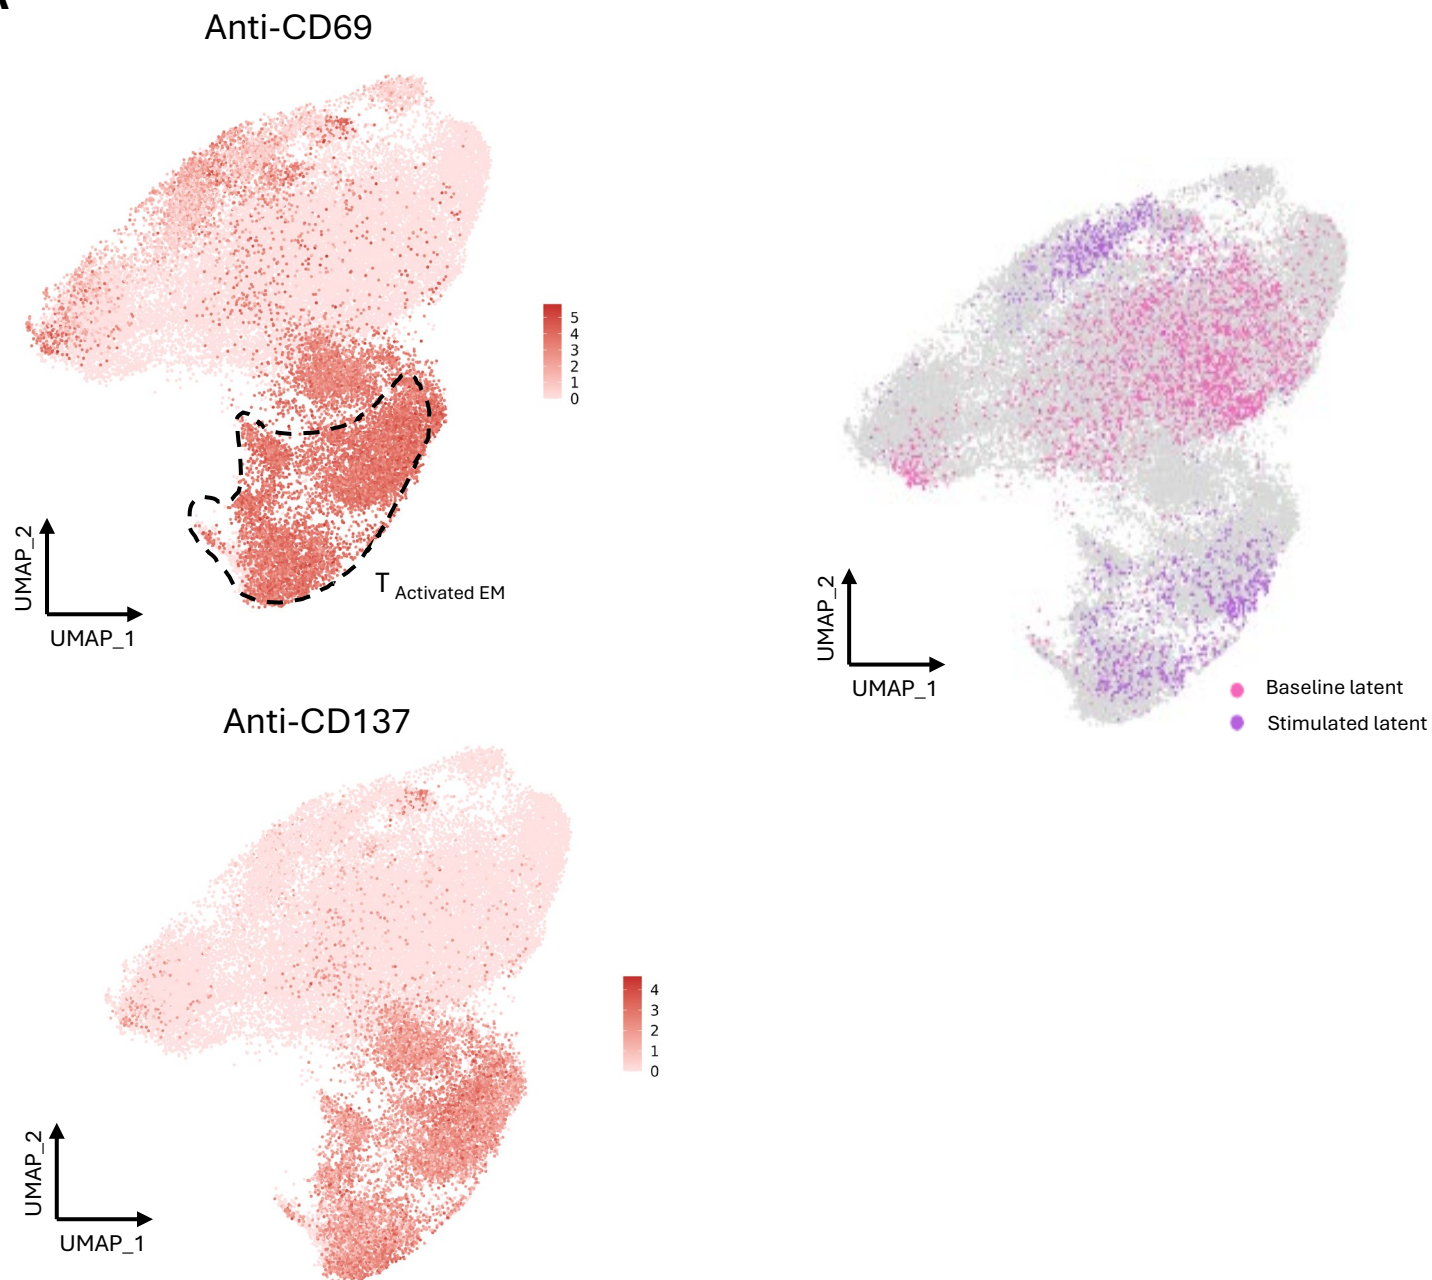

**B**

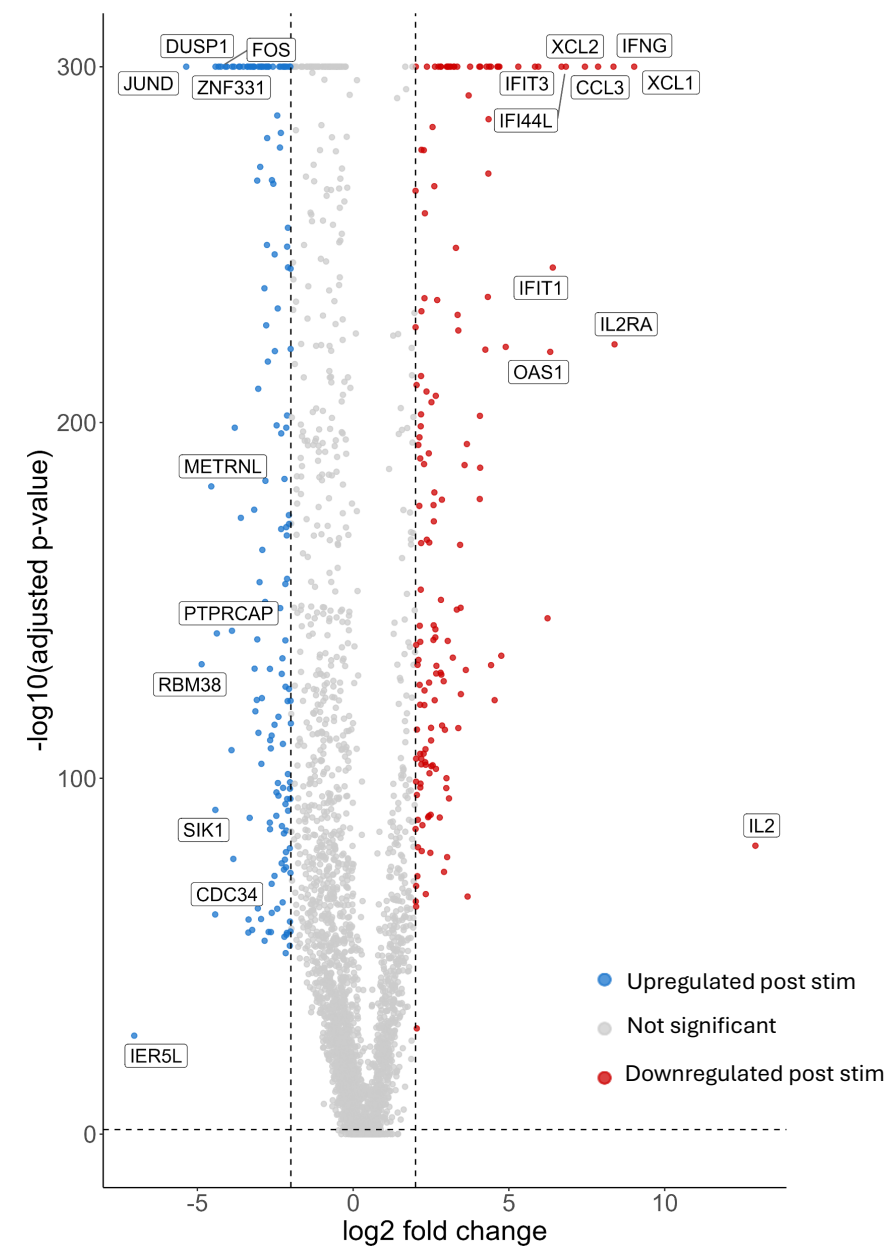

Reactome pathway enrichment analysis

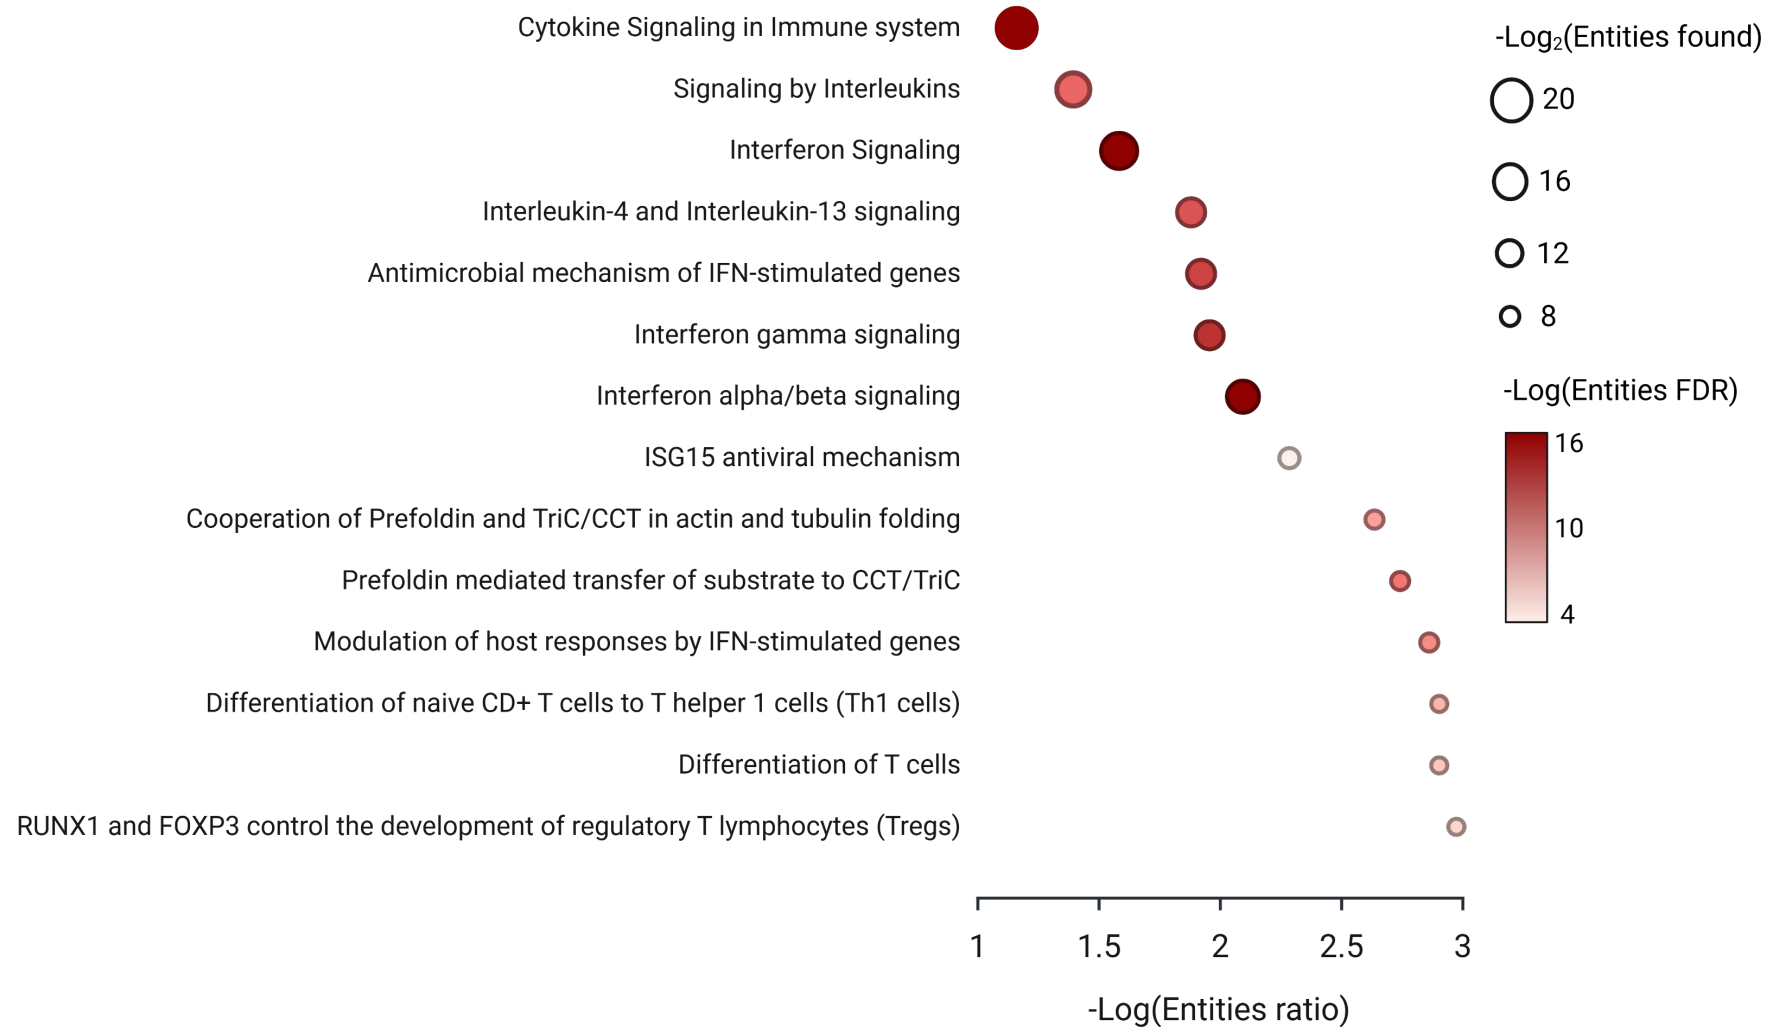

# Supplementary Fig. 6

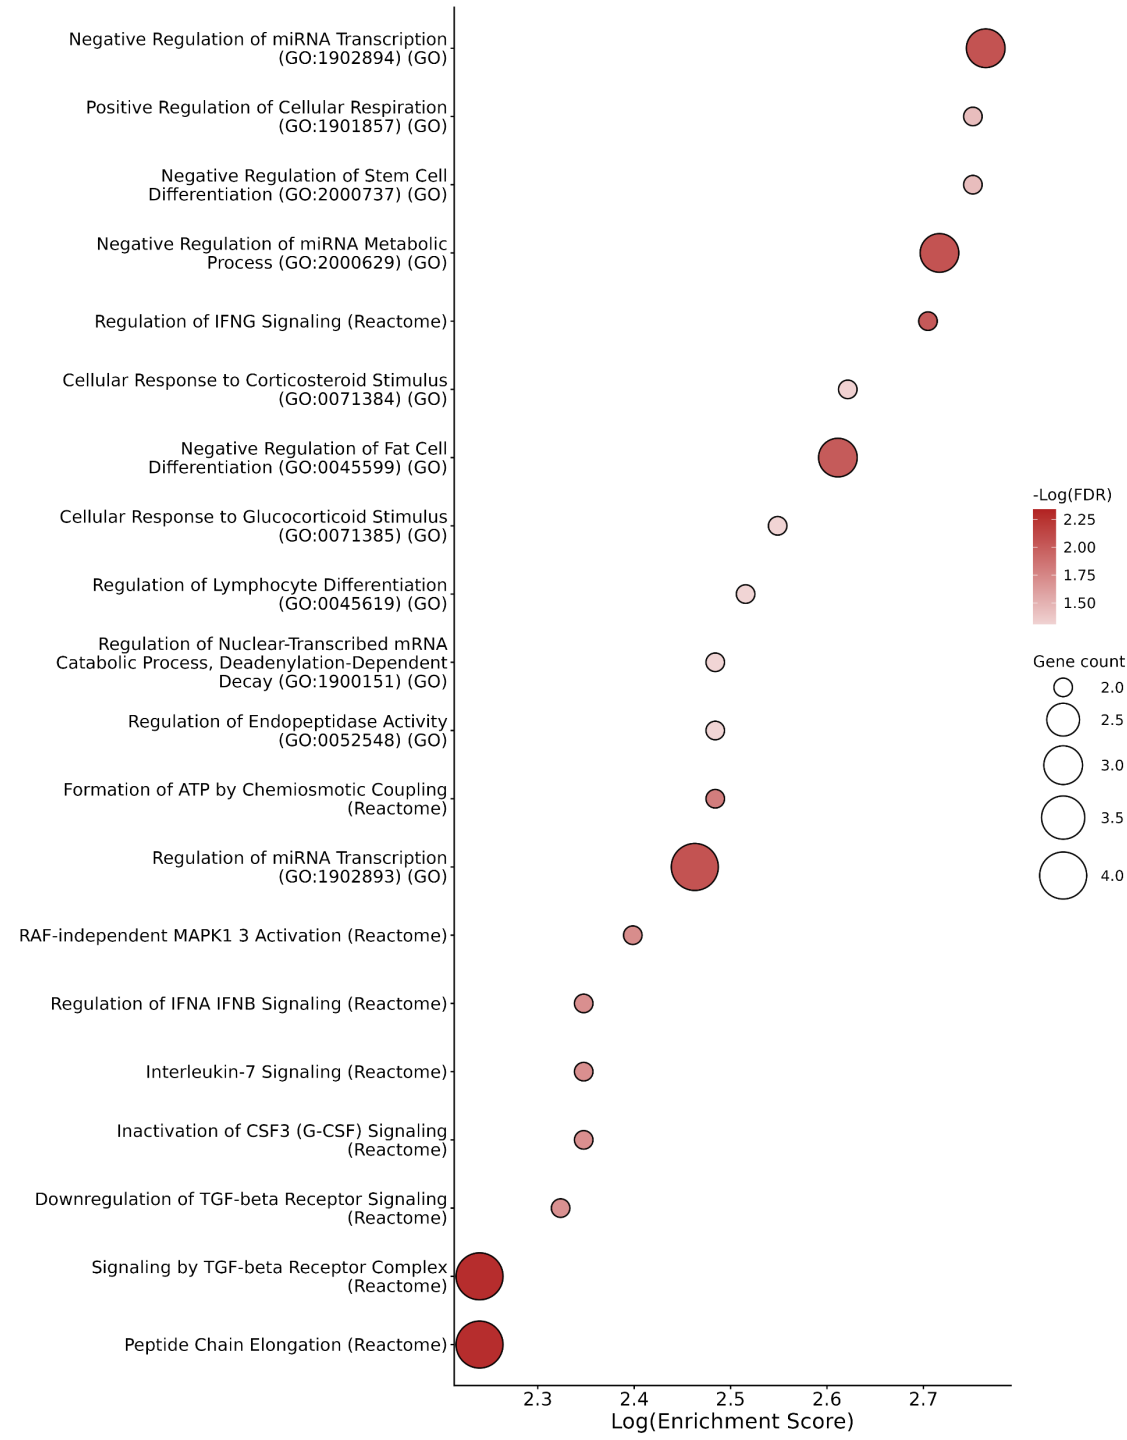

# Supplementary Fig. 7

## HLA-A\*02:01

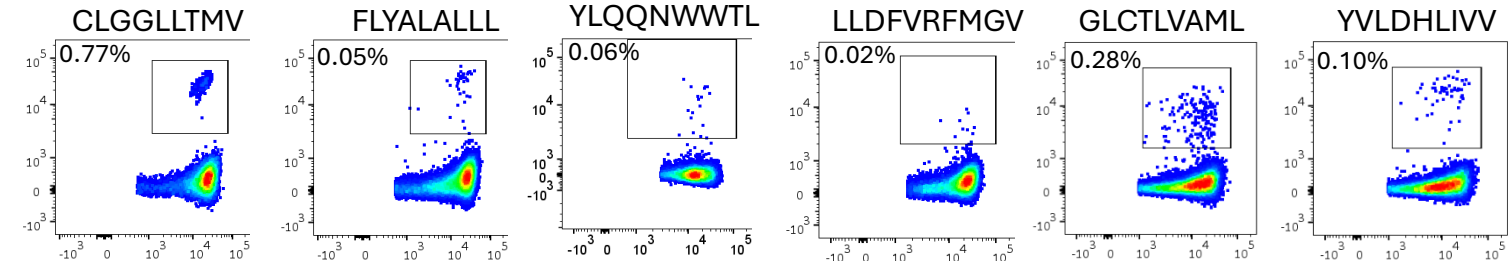

## HLA-A\*24:02

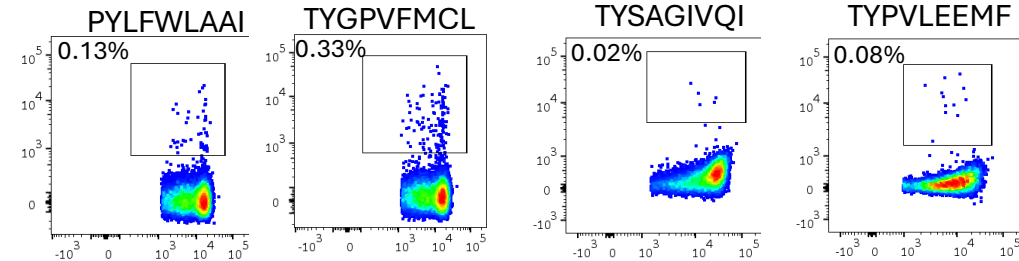

## HLA-A\*11:01

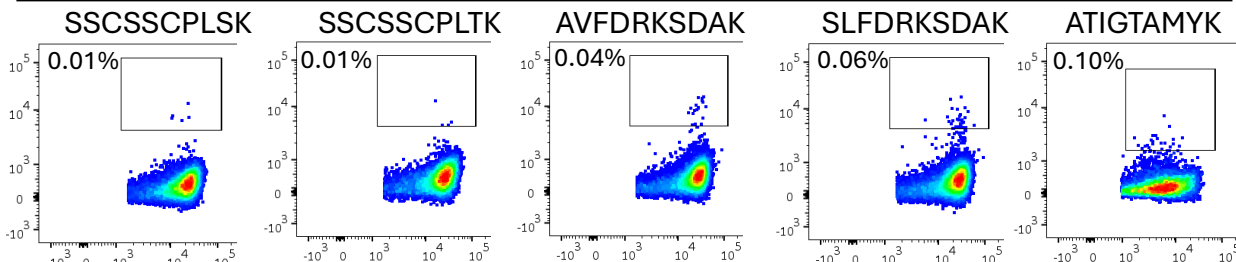

## HLA-B\*08:01

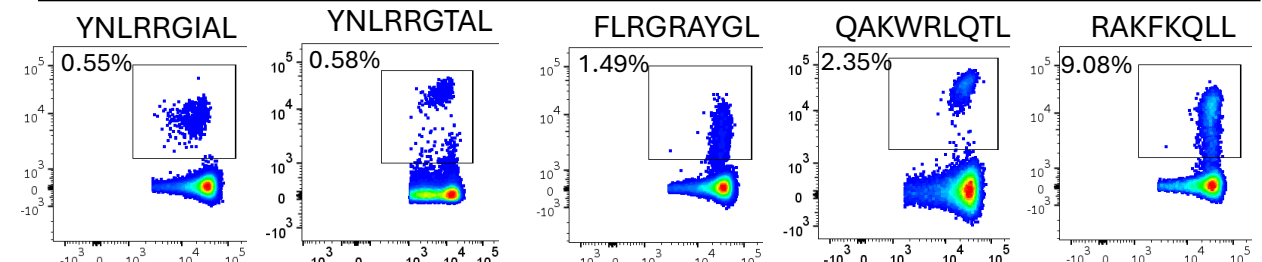

## HLA-B\*07:02

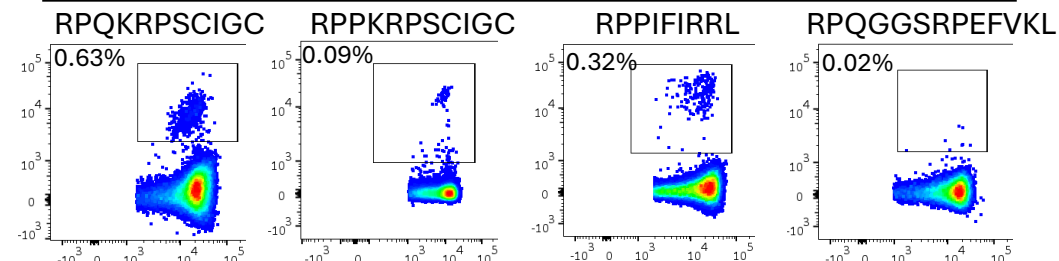

## HLA-B\*35:01

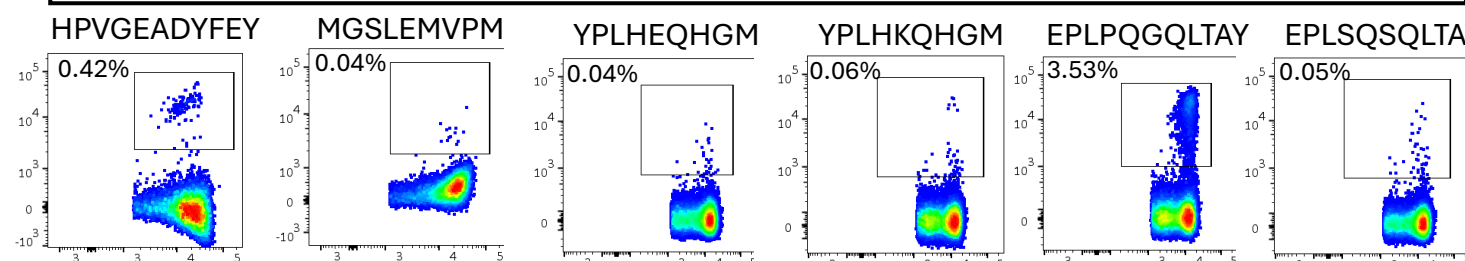

## HLA-B\*40:01

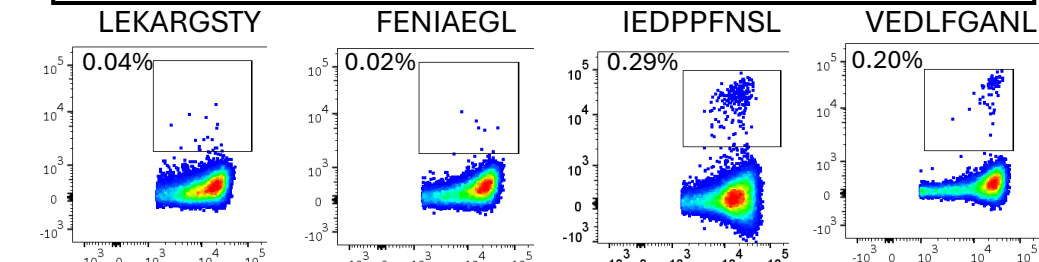

# Supplementary Fig. 8

**A**

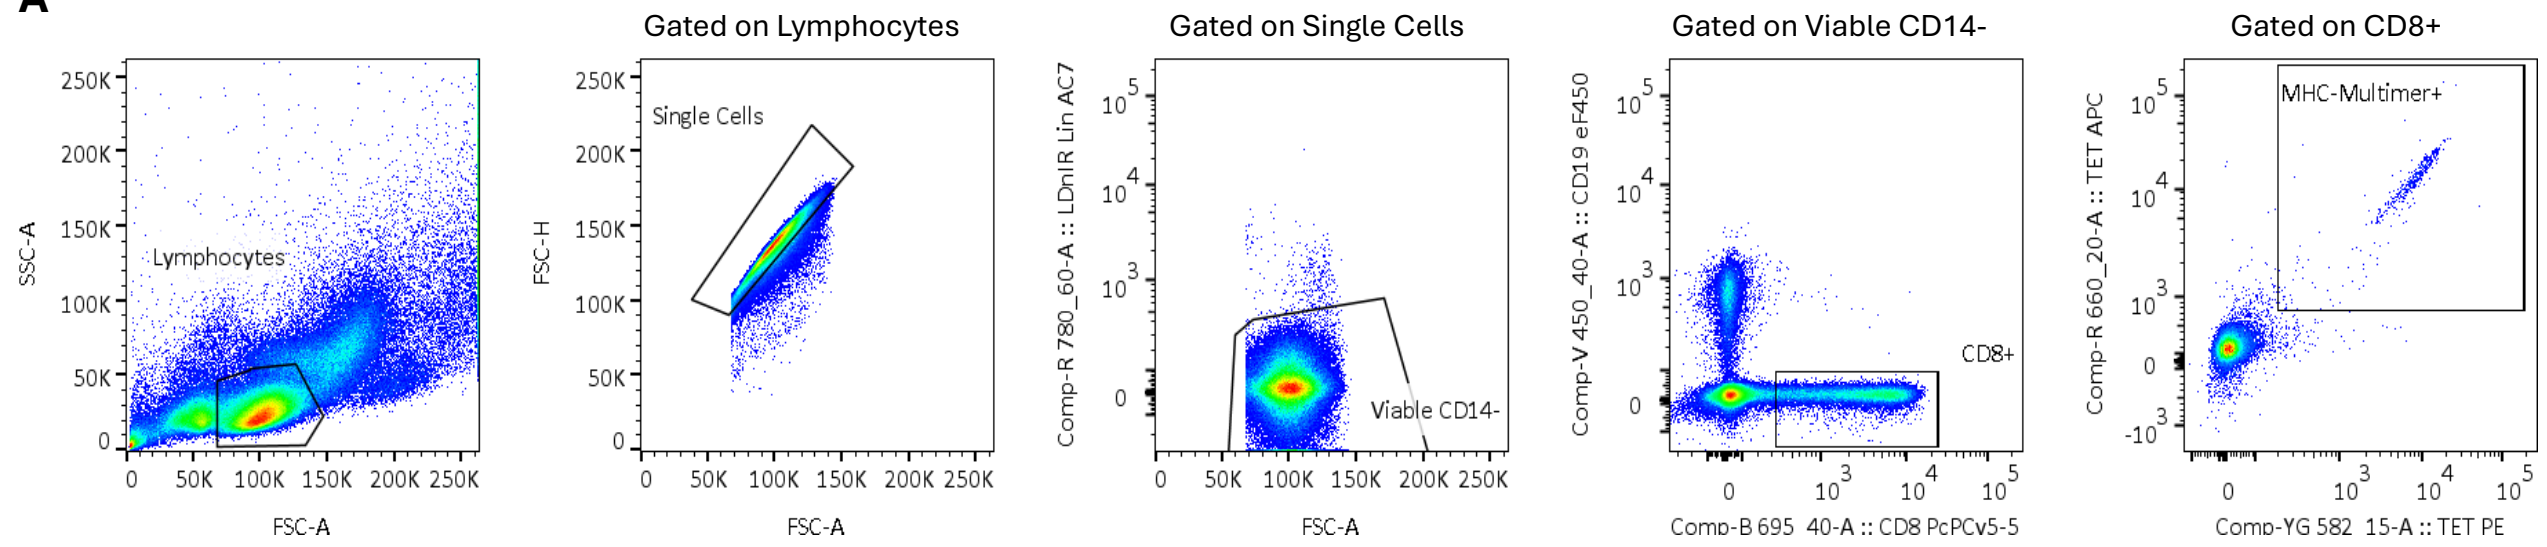

**B**

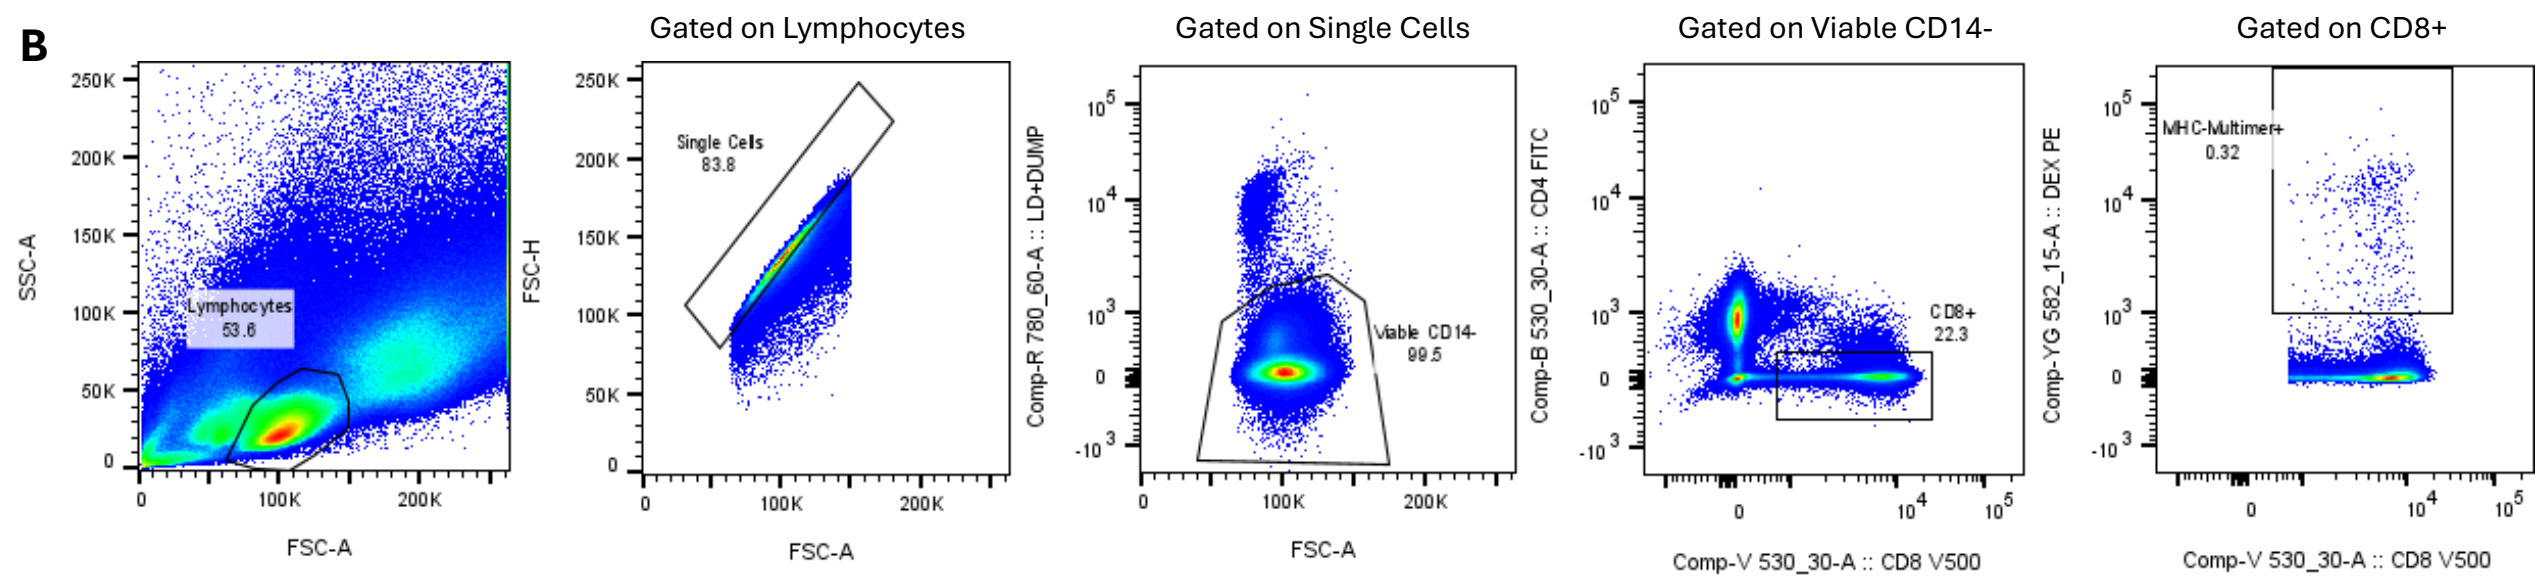

Supplement: Supplementary file 1 [file 149e860b8865ced4d388cf92.pdf]
